# Supplementary material for: Expression and Functional Role of Orphan Receptor GPR158 in Prostate Cancer Growth and Progression
Source: PubMed Central journal article supplement (PMC4333349; doi:10.1371/journal.pone.0117758), 2015-02-18
Supplement: pone.0117758.s001.pdf [file pone.0117758.s001.pdf]

**Figure S1. Detection of GPR158 and AR in the DU145 and PC-3 cell lines used in this study.**

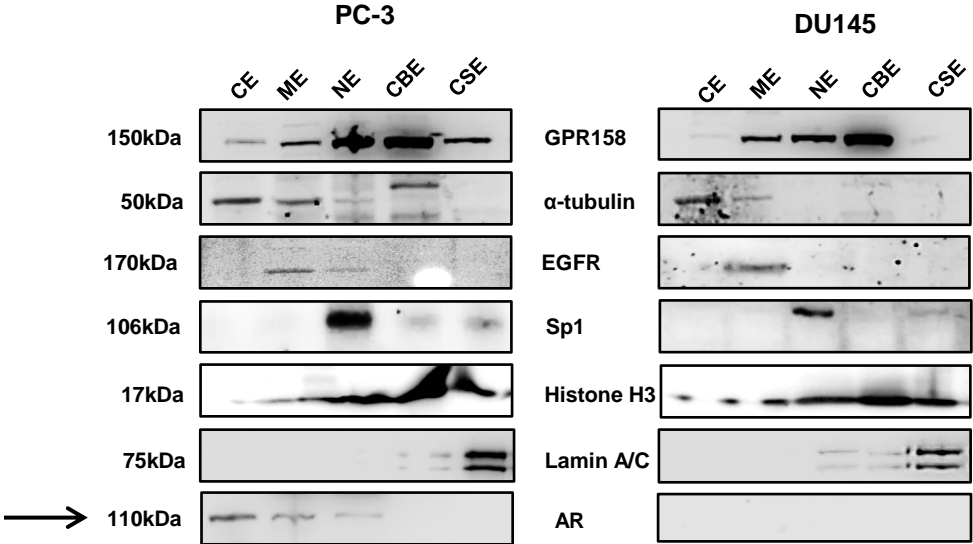

CE, ME, NE & CBE: 30µg  
CSE: 10µg
