# Supplementary material for: Expression and Functional Role of Orphan Receptor GPR158 in Prostate Cancer Growth and Progression
Source: PubMed Central journal article supplement (PMC4333349; doi:10.1371/journal.pone.0117758), 2015-02-18

**Figure S3.** Effect of Dox treatment on expression of GPR158, AR and PSA in LNCaP cells.

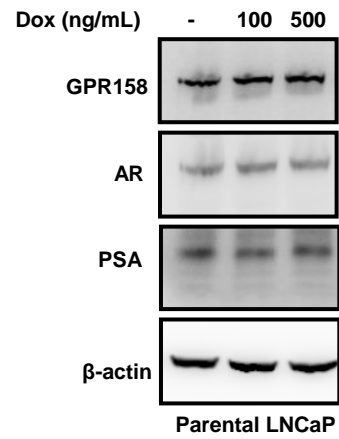

Supplement: pone.0117758.s003.pdf [file pone.0117758.s003.pdf]
