# Supplementary material for: Expression and Functional Role of Orphan Receptor GPR158 in Prostate Cancer Growth and Progression
Source: PubMed Central journal article supplement (PMC4333349; doi:10.1371/journal.pone.0117758), 2015-02-18

**Figure S4. GPR158 and GPR179 mRNA expression in human prostate cancer.**

Case Set: All Tumors: All tumor samples (216 samples)

Altered in 19 (9%) of cases

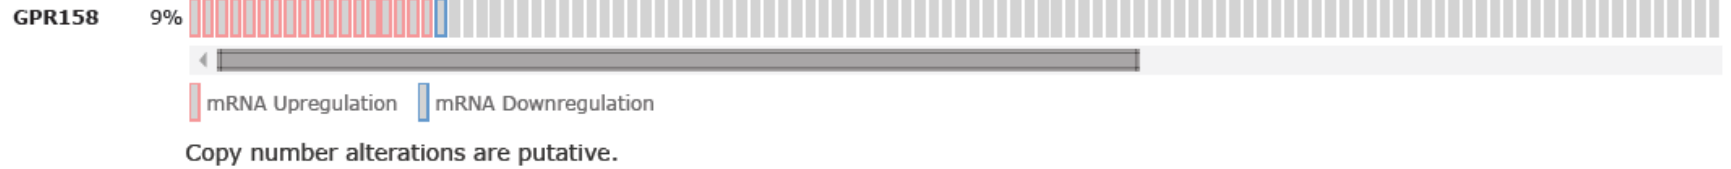

Case Set: All Tumors: All tumor samples (216 samples)

Altered in 25 (12%) of cases

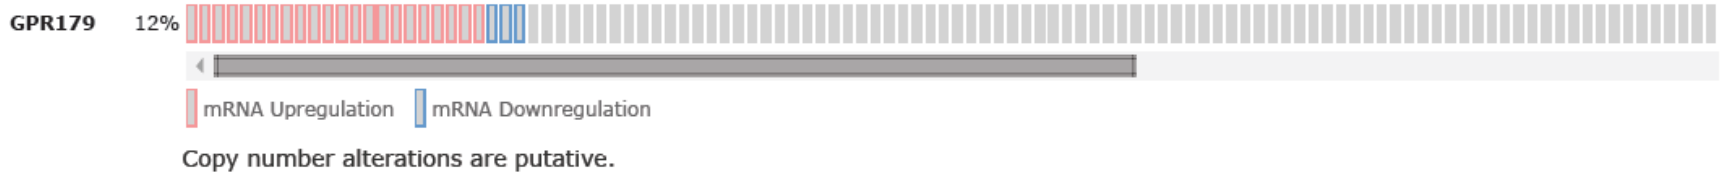

Supplement: pone.0117758.s004.pdf [file pone.0117758.s004.pdf]
